# Supplementary material for: Synthesis, photoluminescent and electroluminescent behaviour of four-coordinate tetrahedral gold(i) complexes. X-Ray crystal structure of [Au(dppn)2]Cl
Source: Royal Society of Chemistry journal article supplement (doi:10.1039/a908521a), 2000-01-01
Supplement: a908521a.doc [file a908521a.doc]

# Supporting information

**Characterization of 1a**: 1H NMR (270 MHz, CD3CN, 298 K, relative to SiMe4):  6.71 – 6.84 (m, 32 H, PPh2), 7.10 (t, 8 H, Np), 7.57 (m, 8 H, PPh2), 8.24 (d, 4 H, Np). Positive FAB-MS: *m/z* = 1189 {M}+. IR (Nujol) /cm-1 833 (s, P-F). Found: C, 62.03; H, 3.93. Calc. for **1a**·0.5CH2Cl2: C, 61.76; H, 3.98 %. **2**: 1H NMR (300 MHz, CD2Cl2, 398 K, relative to SiMe4):  2.90 (s, 6 H, Me group of Np), 6.61 – 6.88 (m, 32 H, PPh2), 7.05 (m, 8 H, Np), 7.36 – 7.62 (m, 8 H, PPh2), 8.44 (d, 2 H, Np). Positive FAB-MS: *m/z* = 1217 {M}+. IR (Nujol) /cm-1 840 (s, P-F). Found: C, 60.94; H, 4.01. Calc. for **2**·0.5CH2Cl2: C, 60.97; H, 4.08 %.

**EL measurements:** The single layer EL device was fabricated by spin casting the 1,2-dichloroethane solution of compounds **1a** or **2** with polycarbonate (PC) (**1a** or **2**: PC in 40% w/w), onto glass substrate coated with an indium-tin-oxide (ITO) to form an emissive layer. No phase separation was observed at this concentration. Aluminum cathodes were vacuum deposited on the emissive film. The EL spectra were collected on an ORIEL MS-257 monochromator equipped with an ANDOR DV420-BV charge-coupled device (CCD) detector.

**Crystal data** of [Au(dppn)2]Cl. [(C68H52P4Au)+Cl-]; formula weight = 1225.47, monoclinic, space group *P*21/*n* (No. 14), *a* = 16.981(4) Å, *b* = 13.527(4) Å, c = 26.399(4) Å, ** = 98.75(2), *V* = 5993(2) Å3, *Z* = 4, *D*c = 1.358 g cm-3, **(Mo–K**) = 26.53 cm-1, *F*(000) = 2464, *T* = 301 K. A yellow crystal of dimensions 0.35×0.20×0.10 mm mounted on a glass fibre was used for data collection at 28ºC on a Enraf–Nonius CAD4 diffractometer with graphite monochromatized Mo–K**radiation ( = 0.71073 Å) using **-2** scans with angle (0.75 + 0.325 tan **)º at a scan speed of 1.37 to 5.49 deg min-1. Intensity data (in the range of 2**max = 50º; *h*: 0 to 20; *k*: 0 to 15; *l*= -30 to 29 and 3 standard reflections measured after every 2 hours showed no decay), were corrected for Lorentz and polarization effects, and empirical absorption corrections based on the **–scan of five strong reflections (minimum and maximum transmission factors 0.866 and 1.000). Of the 10470 reflections measured, 10130 were unique and *R*int = 0.072. 4753 reflections with *I*  3 ** (*I*) were considered observed and used in the structural analysis. The space group was unquely determined based on systematic absences and the structure was solved by Patterson and Fourier methods (*PATTY*1) and refinement by full-matrix least squares using the software package *TeXscan*2 on a Silicon Graphics Indy computer. A crystallographic asnmmetric unit consists of the formula unit. The chloride anion was disordered and was placed at two positions with Cl(1) and Cl(2) each having occupation numbers of 0.5. In the least-squares refinement, all non-H atoms of the complex cation were refined anisotropically, Cl(1) and Cl(2) had large temperature factors and were refined isotropically, and 52 H atoms at calculated positions with thermal parameters equal to 1.3 times that of the attached C atoms were not refined. Convergence for 666 variables by least squares refinement on *F* with *w* = 4*F*o2/**2(*F*o2), where **2(*F*o2) = [**2(*I*) + (0.036*F*o2)2] for 4753 reflections with *I* > **2(*I*) was reached at *R* = 0.060 and *wR* = 0.088 with a goodness-of-fit of 2.79. (**/**)max = 0.01. The final difference Fourier map was featureless, with maximum positive and negative peaks of 1.21 and 1.40 eÅ-3 respectively.

References:

1. *PATTY*: P. T. Beurskens, G. Admiraal, G. Beurskens, W. P. Bosman, S. Garcia-Granda, R. O. Gould, J. M. M. Smits and C. Smykalla (1992). The *DIRDIF* program system, Technical Report of the Crystallography Laboratory, University of Nijmegen, The Netherlands.
2. *TeXsan*: Crystal Structure Analysis Package, Molecular Structure Corporation, (1985 &, 1992), The Woodlands, Texas, U.S.A.
